# Supplementary material for: Significance of liquid-liquid phase separation (LLPS)-related genes in breast cancer: a multi-omics analysis
Source: publisher site journal article supplement (doi:10.18632/aging.204812), 2023-06-19
Supplement: Supplementary file [file aging-v15i12-204812-supplementary-material-SD1.pdf]

SUPPLEMENTARY FIGURE

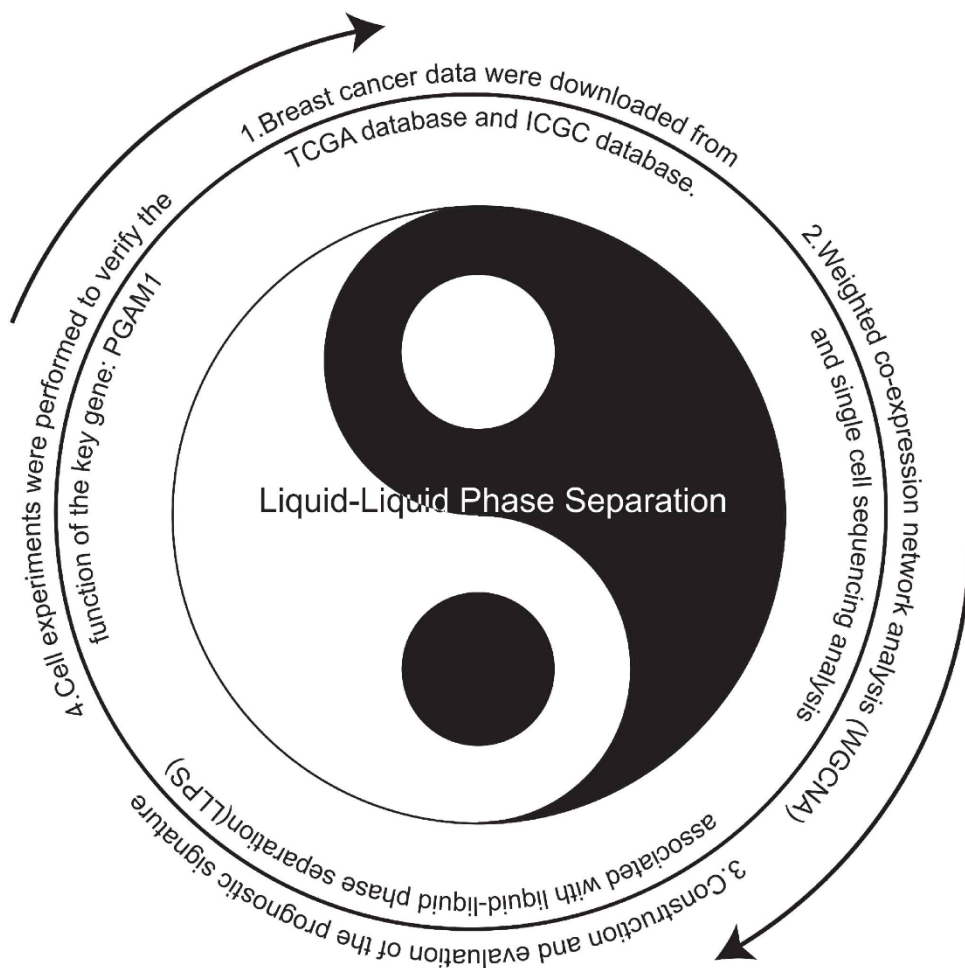

Supplementary Figure 1. The flow chart.
